# Supplementary material for: High-Prevalence Vitamin D Deficiency among Korean Emergency Department Homeless, with a Comparison to a Healthy Korean Population
Source: MDPI journal article supplement (doi:10.3390/nu11040763), 2019-04-01
Supplement: s1 [file s1]

**Table S1.** Characteristics of Homeless whose laboratory tests were not done.

| Variables                 | N (%) or Mean $\pm$ SD |
|---------------------------|------------------------|
| Total number              | 89                     |
| Age                       | 51 $\pm$ 11            |
| Male                      | 82 (92%)               |
| Alcohol-intoxicated state | 64 (71.9%) *           |
| Alcohol dependency        | 84 (94.4%)             |
| Diabetes                  | 13 (14.6%)             |
| Hypertension              | 14 (15.7%)             |
| Liver cirrhosis           | 8 (9.0%)               |
| Malignancy                | 0 (0%)                 |
| Initial Presentation      |                        |
| Musculoskeletal problem   | 72 (80.9%)             |
| Acute pain                | 12 (13.5%)             |
| Facial injury             | 2 (2.5%)               |
| Gastrointestinal symptom  | 3 (3.4%)               |

\*, P value less than 0.05 when comparing to the enrolled homeless; Student's T test or chi-square test were used.

**Table S2.** Characteristics of healthy control and homeless before propensity matching.

|                                         | Control<br><i>n</i> = 11067 | Homeless<br><i>n</i> = 179 | <i>p</i> -value |
|-----------------------------------------|-----------------------------|----------------------------|-----------------|
| Male, <i>n</i> (%)                      | 4707 (42.5%)                | 170 (95.0%)                | <0.001          |
| Age, mean $\pm$ SD                      | 50 $\pm$ 17                 | 52 $\pm$ 9                 | 0.088           |
| Hypertension, <i>n</i> (%)              | 2541 (23.0%)                | 21 (11.7%)                 | 0.002           |
| Diabetes, <i>n</i> (%)                  | 918 (8.3%)                  | 24 (13.4%)                 | 0.020           |
| Liver cirrhosis, <i>n</i> (%)           | 36 (0.3%)                   | 16 (8.9%)                  | <0.001          |
| WBC ( $\times 10^3$ /uL), mean $\pm$ SD | 6.0 $\pm$ 1.7               | 8.0 $\pm$ 4.0              | <0.001          |
| Hemoglobin (g/dL), mean $\pm$ SD        | 14.0 $\pm$ 1.6              | 13.6 $\pm$ 2.1             | 0.001           |
| BUN (mg/dL), mean $\pm$ SD              | 14 $\pm$ 4                  | 14 $\pm$ 11                | 0.423           |
| Creatinine (mg/dL), mean $\pm$ SD       | 0.8 $\pm$ 0.2               | 0.9 $\pm$ 0.7              | 0.018           |
| AST (IU/L), mean $\pm$ SD               | 22 $\pm$ 14                 | 86 $\pm$ 103               | <0.001          |
| ALT (IU/L), mean $\pm$ SD               | 21 $\pm$ 19                 | 37 $\pm$ 37                | <0.001          |

WBC: white blood cell, Hb: hemoglobin, BUN: blood urea nitrogen, AST: aspartate aminotransferase, ALT: alanine aminotransferase; Student's T test or chi-square test were used.

**Table S3.** Characteristics of healthy same city (Seoul) control and homeless before propensity matching.

|                                       | <b>Control<br/><i>n</i> = 2304</b> | <b>Homeless<br/><i>n</i> = 179</b> | <b><i>p</i>-value</b> |
|---------------------------------------|------------------------------------|------------------------------------|-----------------------|
| Male, <i>n</i> (%)                    | 967 (42.3%)                        | 170 (95.0%)                        | <0.001                |
| Age, mean ± SD                        | 48 ± 16                            | 52 ± 9                             | <0.001                |
| Hypertension, <i>n</i> (%)            | 460 (20.0%)                        | 21 (11.7%)                         | 0.008                 |
| Diabetes, <i>n</i> (%)                | 161 (7%)                           | 24 (13.4%)                         | 0.003                 |
| Liver cirrhosis, <i>n</i> (%)         | 4 (0.2%)                           | 16 (8.9%)                          | <0.001 *              |
| WBC (×10 <sup>3</sup> /uL), mean ± SD | 5.9 ± 1.7                          | 8.0 ± 4.0                          | <0.001                |
| Hemoglobin (g/dL), mean ± SD          | 13.9 ± 1.6                         | 13.6 ± 2.1                         | 0.004                 |
| BUN (mg/dL), mean ± SD                | 14 ± 4                             | 14 ± 11                            | 0.141                 |
| Creatinine (mg/dL), mean ± SD         | 0.8 ± 0.2                          | 0.9 ± 0.7                          | 0.082                 |
| AST (IU/L), mean ± SD                 | 22 ± 15                            | 86 ± 103                           | <0.001                |
| ALT (IU/L), mean ± SD                 | 21 ± 22                            | 37 ± 37                            | <0.001                |

WBC: white blood cell, Hb: hemoglobin, BUN: blood urea nitrogen, AST: aspartate aminotransferase, ALT: alanine aminotransferase; Student's T test or chi-square test were used; \*, Fisher's exact test were used.

**Table S4.** Characteristics of healthy national control and homeless after propensity matching.

|                                       | <b>Control<br/><i>n</i> = 358</b> | <b>Homeless<br/><i>n</i> = 179</b> | <b><i>p</i>-value</b> |
|---------------------------------------|-----------------------------------|------------------------------------|-----------------------|
| Male, <i>n</i> (%)                    | 340 (95.0%)                       | 170 (95.0%)                        | > 0.999               |
| Age, mean ± SD                        | 52 ± 9                            | 52 ± 9                             | > 0.999               |
| Hypertension, <i>n</i> (%)            | 82 (22.9%)                        | 21 (11.7%)                         | 0.003                 |
| Diabetes, <i>n</i> (%)                | 39 (10.9%)                        | 24 (13.4%)                         | 0.477                 |
| Liver cirrhosis, <i>n</i> (%)         | 5 (1.4%)                          | 16 (8.9%)                          | <0.001                |
| WBC (×10 <sup>3</sup> /uL), mean ± SD | 6.4 ± 1.8                         | 8.0 ± 4.0                          | <0.001                |
| Hemoglobin (g/dL), mean ± SD          | 15.2 ± 1.3                        | 13.6 ± 2.1                         | <0.001                |
| BUN (mg/dL), mean ± SD                | 15 ± 4                            | 14 ± 11                            | 0.583                 |
| Creatinine (mg/dL), mean ± SD         | 1.0 ± 0.2                         | 0.9 ± 0.7                          | 0.048                 |
| AST (IU/L), mean ± SD                 | 26 ± 14                           | 86 ± 103                           | <0.001                |
| ALT (IU/L), mean ± SD                 | 27 ± 17                           | 37 ± 37                            | <0.001                |

WBC: white blood cell, Hb: hemoglobin, BUN: blood urea nitrogen, AST: aspartate aminotransferase, ALT: alanine aminotransferase; Student's T test or chi-square test were used.

**Table S5.** Characteristics of healthy same city (Seoul) control and homeless after propensity matching.

|                                       | <b>Control<br/><i>n</i> = 358</b> | <b>Homeless<br/><i>n</i> = 179</b> | <b><i>p</i>-value</b> |
|---------------------------------------|-----------------------------------|------------------------------------|-----------------------|
| Male, <i>n</i> (%)                    | 340 (95.0%)                       | 170 (95.0%)                        | > 0.999               |
| Age, mean ± SD                        | 52 ± 9                            | 52 ± 9                             | 0.900                 |
| Hypertension, <i>n</i> (%)            | 82 (22.9%)                        | 21 (11.7%)                         | 0.003                 |
| Diabetes, <i>n</i> (%)                | 33 (9.2 %)                        | 24 (13.4%)                         | 0.181                 |
| Liver cirrhosis, <i>n</i> (%)         | 1 (0.3%)                          | 16 (8.9%)                          | <0.001                |
| WBC (×10 <sup>3</sup> /uL), mean ± SD | 6.2 ± 1.5                         | 8.0 ± 4.0                          | <0.001                |
| Hemoglobin (g/dL), mean ± SD          | 15.1 ± 1.2                        | 13.6 ± 2.1                         | <0.001                |
| BUN (mg/dL), mean ± SD                | 15 ± 4                            | 14 ± 11                            | 0.505                 |
| Creatinine (mg/dL), mean ± SD         | 1.0 ± 0.2                         | 0.9 ± 0.7                          | 0.027                 |
| AST (IU/L), mean ± SD                 | 27 ± 26                           | 86 ± 103                           | <0.001                |
| ALT (IU/L), mean ± SD                 | 28 ± 43                           | 37 ± 37                            | 0.022                 |

WBC: white blood cell, Hb: hemoglobin, BUN: blood urea nitrogen, AST: aspartate aminotransferase, ALT: alanine aminotransferase; Student's T test or chi-square test were used; \*, Fisher's exact test were used.

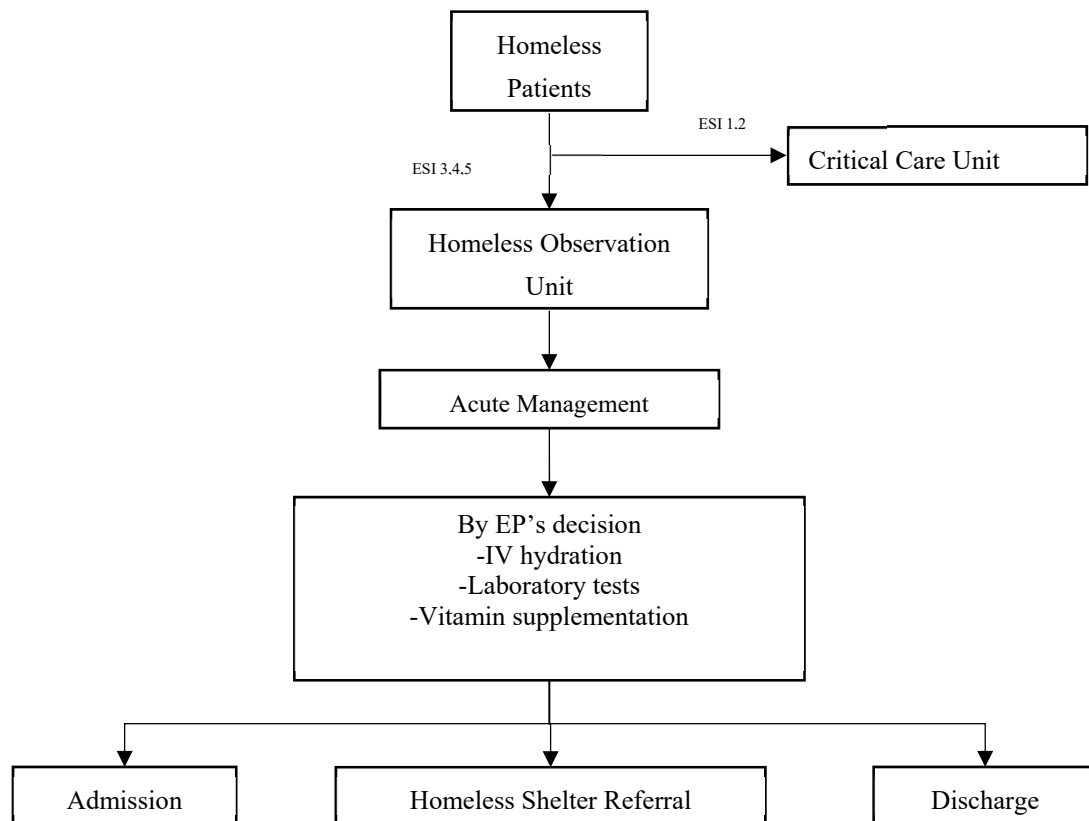

**Figure S1.** Emergency department treatment protocol for the homeless; EP: emergency physician.
